# Supplementary material for: Epidemic potential of Escherichia coli ST131 and Klebsiella pneumoniae ST258: a systematic review and meta-analysis
Source: PubMed Central journal article supplement — BMJ Open. 2016 Mar 17;6(3):e009971. doi: 10.1136/bmjopen-2015-009971 (PMC4800154; doi:10.1136/bmjopen-2015-009971), 2016-03-17

## Supplementary Material

### Supplementary Text 1. Search string.

((k. pneumoniae[All Fields] AND (st258[All Fields] OR st 258[All Fields] OR (((“sequence”[All Fields] AND type[All Fields]) OR sequence type[All Fields]) AND 258[All Fields]))) OR (e. coli[All Fields] AND (st131[All Fields] OR st 131[All Fields] OR (((“sequence”[All Fields] AND type[All Fields]) OR sequence type[All Fields]) AND 131[All Fields])))

AND

(

(“transmission”[Subheading] OR transmissi\*[All Fields] OR transmit\*[All Fields] OR spread\*[All Fields] OR disease outbreaks[All Fields] OR (disease[All Fields] AND outbreaks[All Fields]) OR outbreak\*[All Fields] OR “gene transfer, horizontal”[MeSH Terms] OR (gene[All Fields] AND (“transfer”[All Fields] OR “transfers”[All Fields]) AND horizontal[All Fields]) OR horizontal gene transfer\*[All Fields] OR conjugation\*[All Fields] OR (“plasmids”[MeSH Terms] OR plasmid\*[All Fields]) AND (“transfer”[All Fields] OR “transfers”[All Fields]))

OR

((colonis\*[All Fields] OR coloniz\*[All Fields]) AND (duration\*[All Fields] OR (“period”[All Fields] OR “periods”[All Fields] OR times[All Fields])) OR (infectious[All Fields] AND (“period”[All Fields] OR “periods”[All Fields] OR times[All Fields] OR interval[All Fields] OR intervals[All Fields])) OR (“generation”[All Fields] AND (times[All Fields] OR interval[All Fields] OR intervals[All Fields])))

OR

(“pathogenicity”[Subheading] OR pathogenic\*[All Fields] OR virulen\*[All Fields] OR “virulence”[MeSH Terms] OR infectiv\*[All Fields] OR infectious[All Fields] OR infectious\*[All Fields])

)



**Supplementary Figure 2: Differences in proportion ST131 in colonization versus infection as given by the metaregression model.**

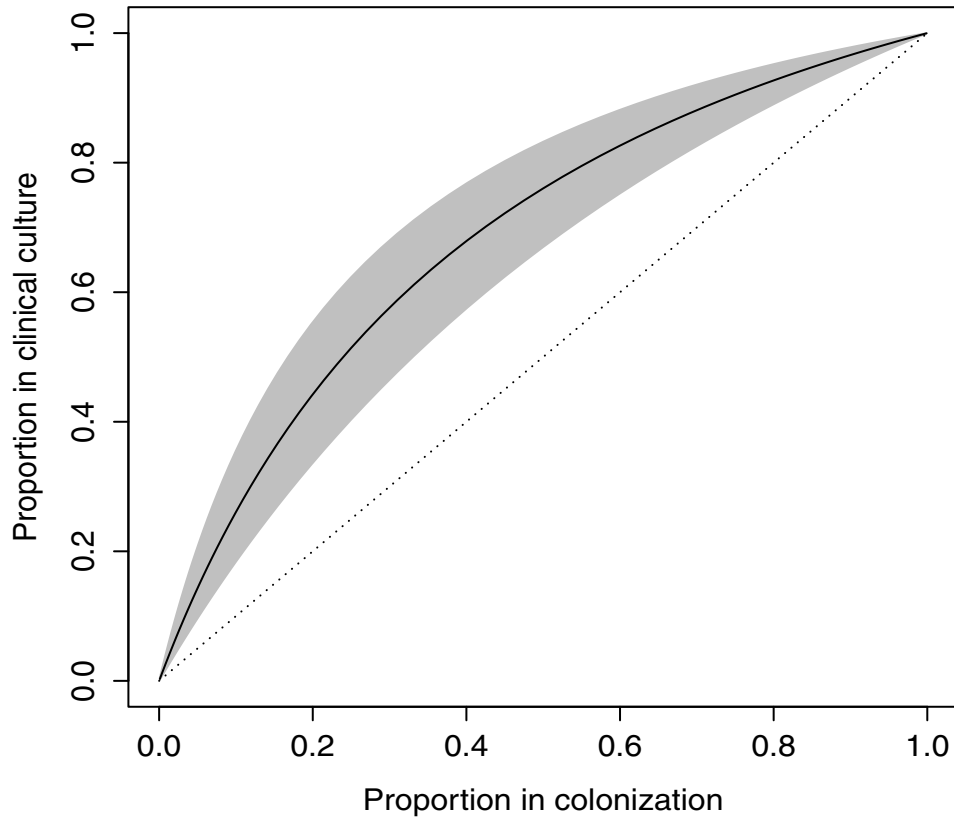

The confidence interval should be interpreted as the confidence interval for the mean effect and not the individual effect. If one would average the proportions *E. coli* ST131 found in 100 studies, the mean should fall within the limits of the confidence interval of this graph 95% of the times.

Supplementary Figure 3: Forest plot showing proportion ST258 in *K. pneumoniae*

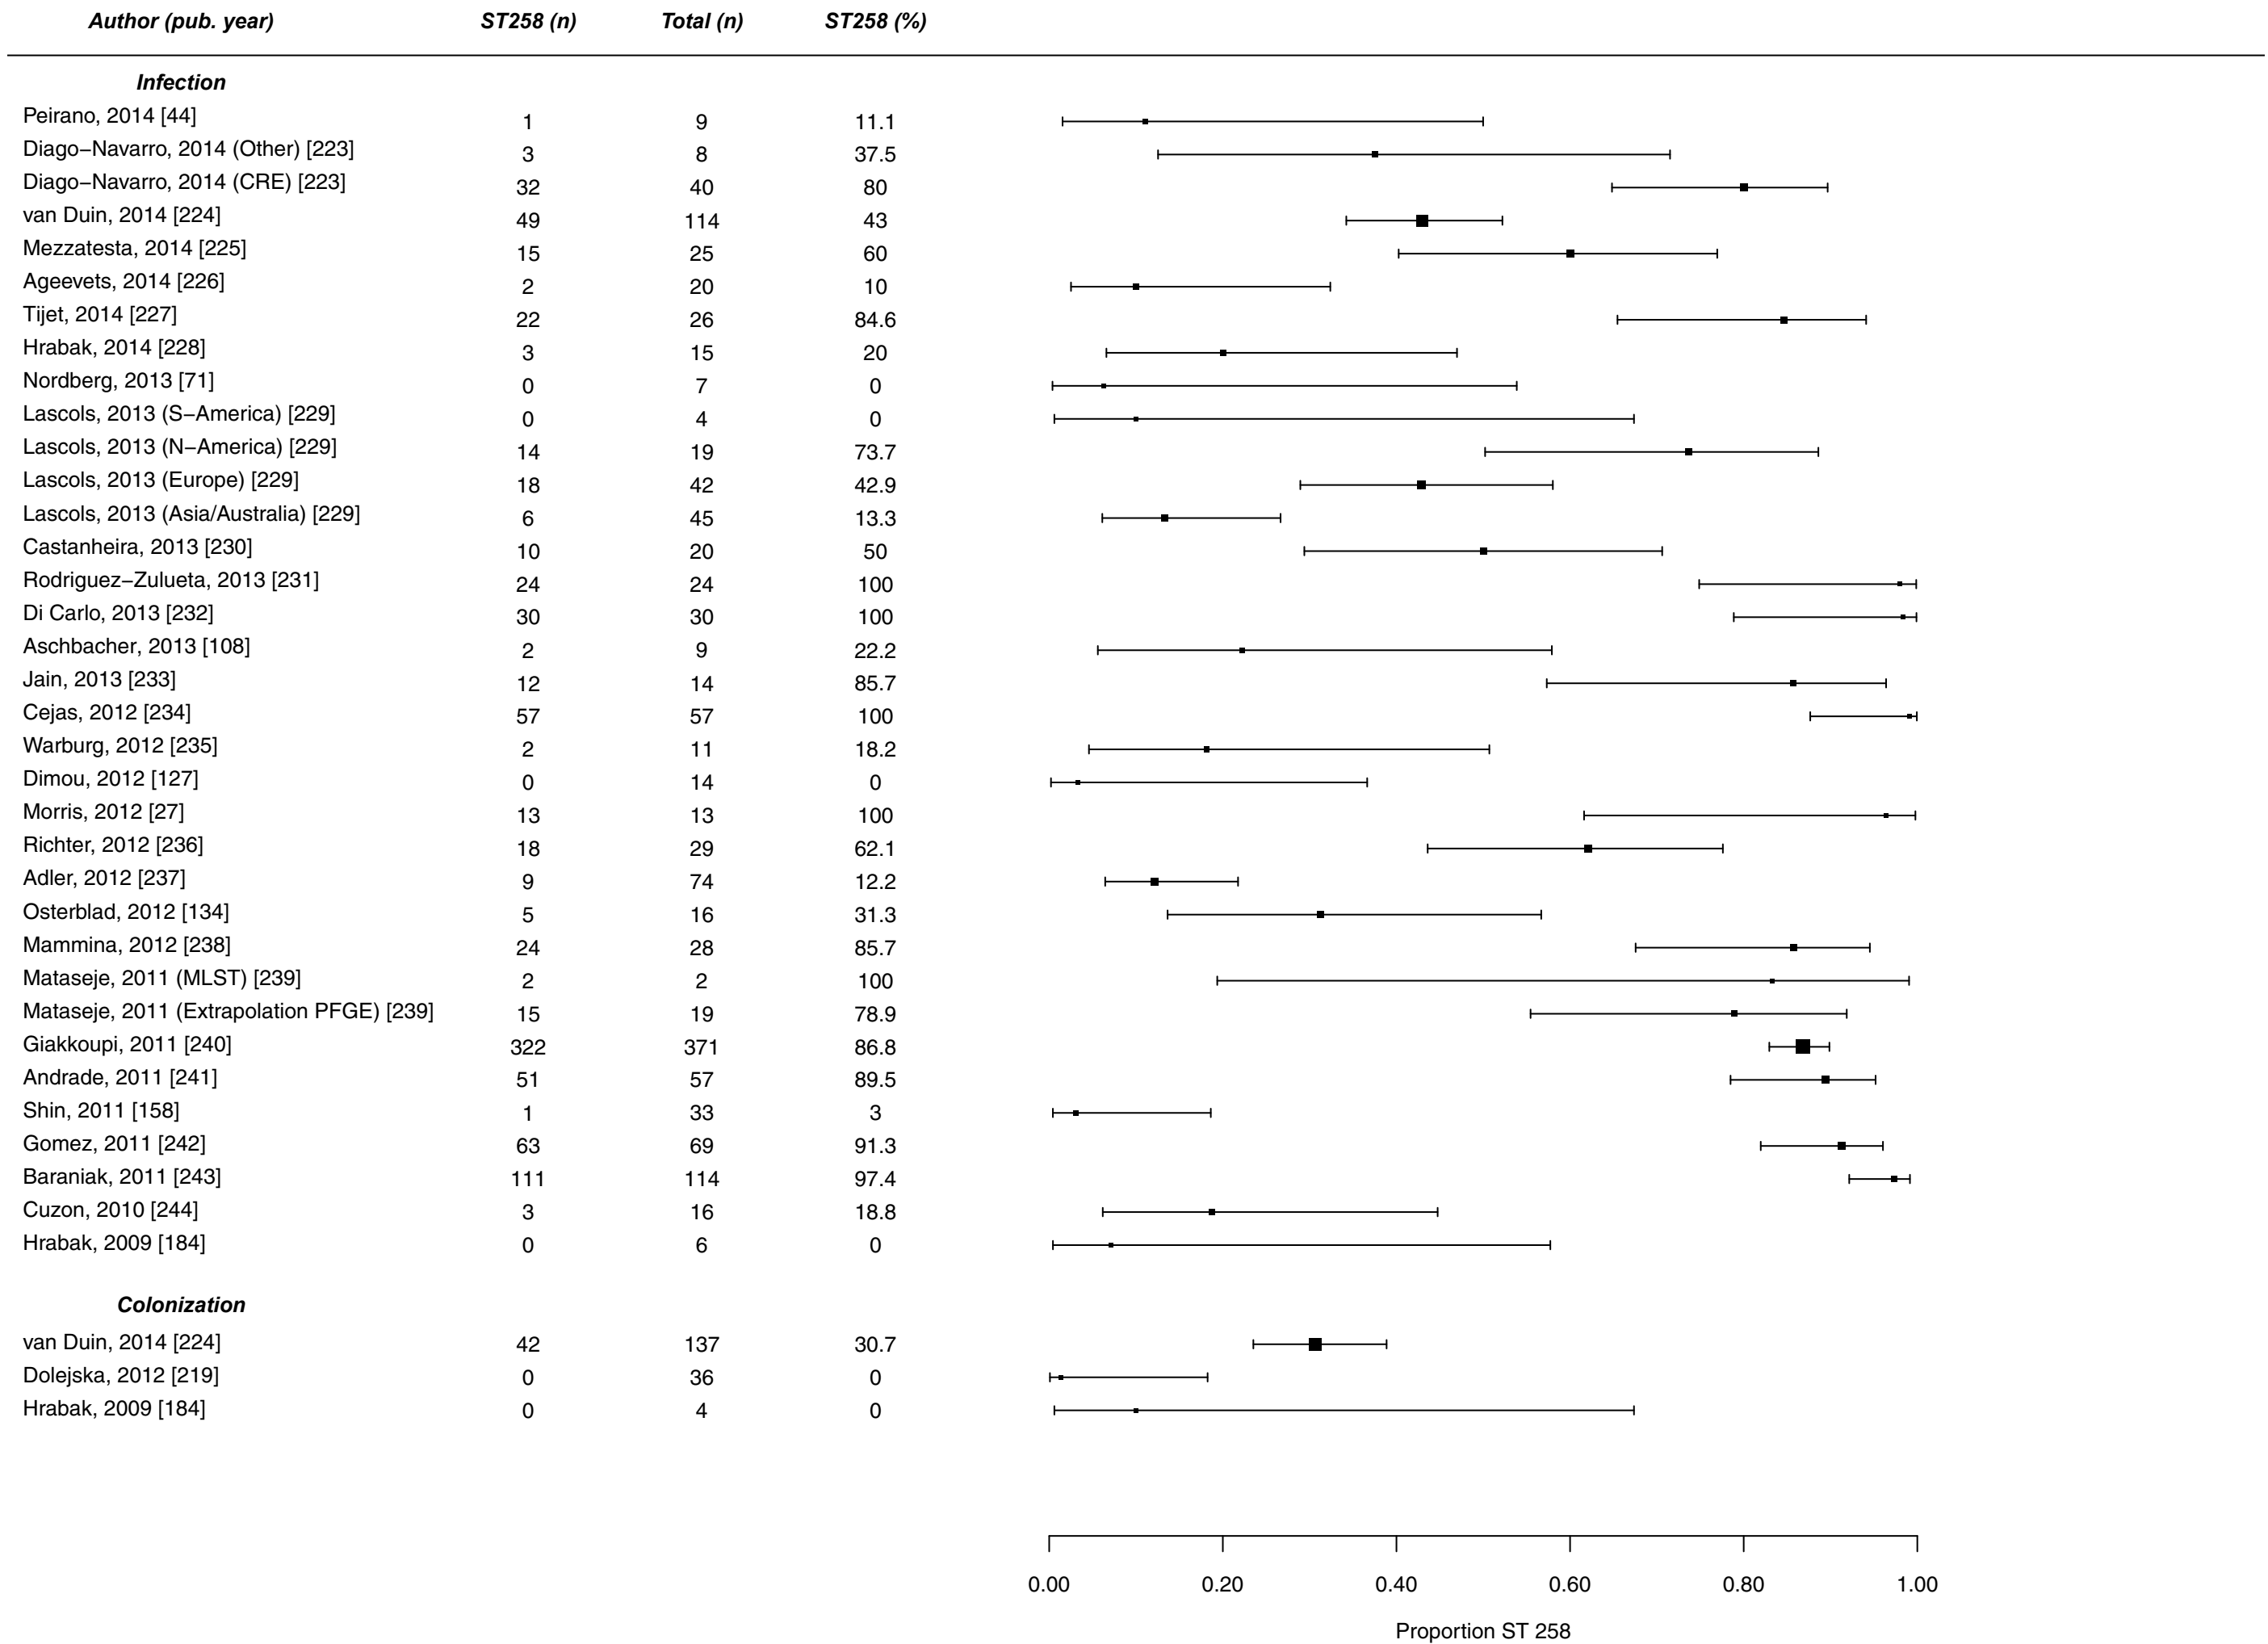

Supplement: bmjopen-2015-009971supp.pdf [file bmjopen-2015-009971supp.pdf]
